# Supplementary material for: Structure and property variations of lead iodide–organic coordination polymers tuned by substituted groups on phenanthroline
Source: Royal Society of Chemistry journal article supplement (doi:10.1039/c1ce05393k), 2011-01-01
Supplement: c1ce05393k.pdf [file c1ce05393k.pdf]

Supplemental materials

## Structures and Properties Variations of Lead Iodide–Organic Coordination Polymers Tuned by Substituted Groups on Phenanthroline

Yan-Ling Wu, Hai-Jun Dong, Min Wang, Shu-Wei Huang, Hao-Hong Li\*, Zhi-Rong Chen\*  
College of Chemistry and Chemical Engineering, Fuzhou University, Fuzhou, Fujian, 350108,  
China

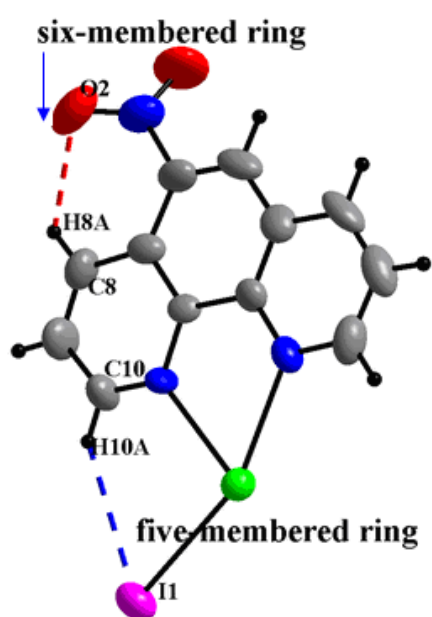

**Fig.S1 Six- and five-membered rings based on C(8)-H(8A)···O(2) and C(10)-H(10A)···I(2) intra-layer H-bonds in 1**

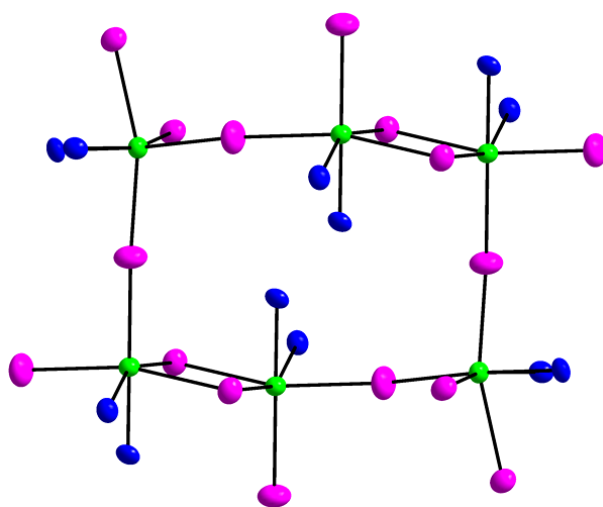

(a)

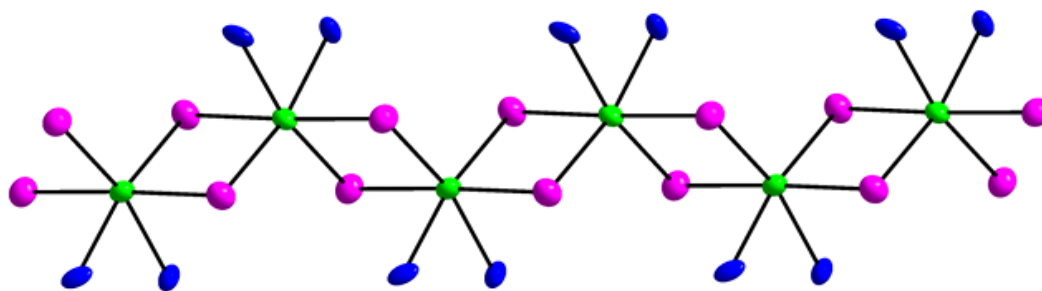

(b)

**Fig.s2 Six-metal-centered models: (a)  $Pb_6I_{16}L_6$  model for EWG-substituted situation; (b)  $Pb_6I_{14}L_6$  models for EDG-substituted situation ( $L$ =substituted phenanthroline ligands), only coordinated N atoms of ligands are presented for clarity**

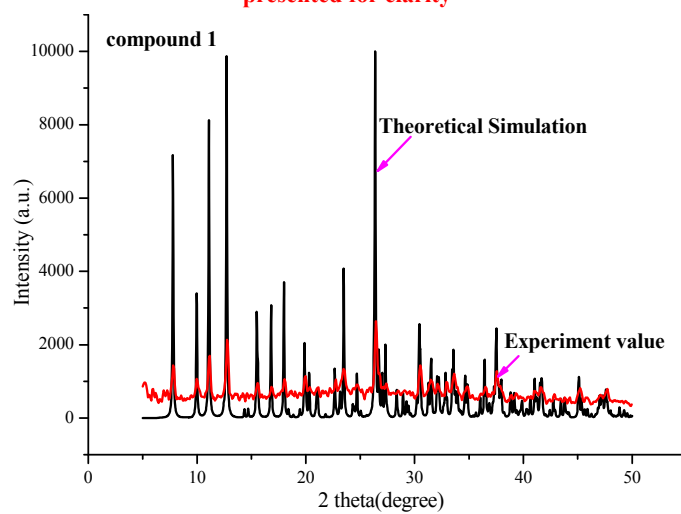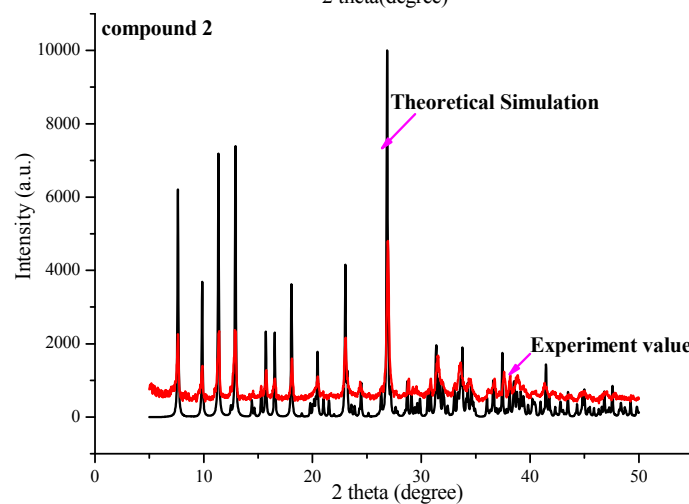

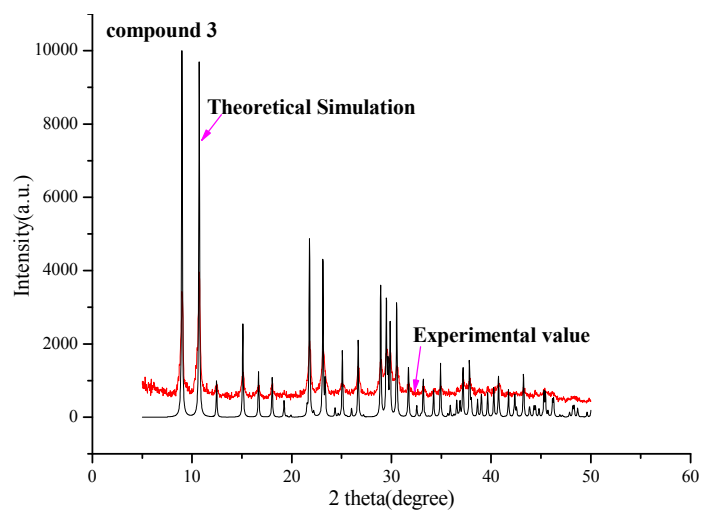

**Fig.s3 X-ray powder diffraction (XRD) patterns of 1-3**
